# Supplementary figures and images for: Functional Characterization of Transforming Growth Factor-β Signaling in Dasatinib Resistance and Pre-BCR+ Acute Lymphoblastic Leukemia
Source: MDPI journal article supplement (doi:10.3390/cancers15174328), 2023-08-30

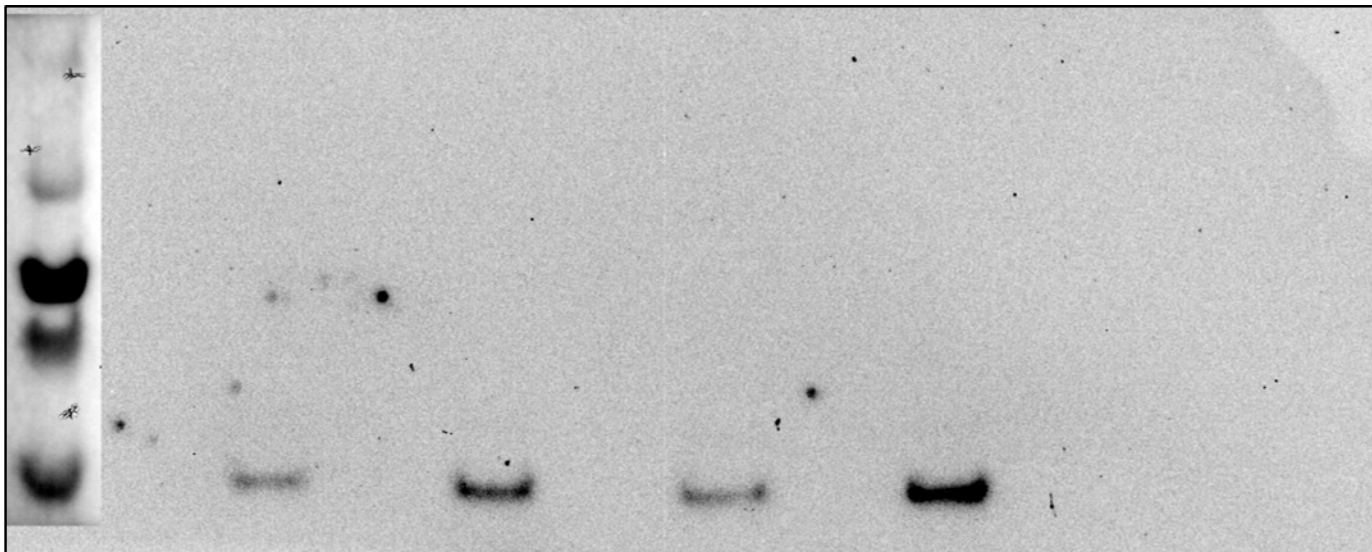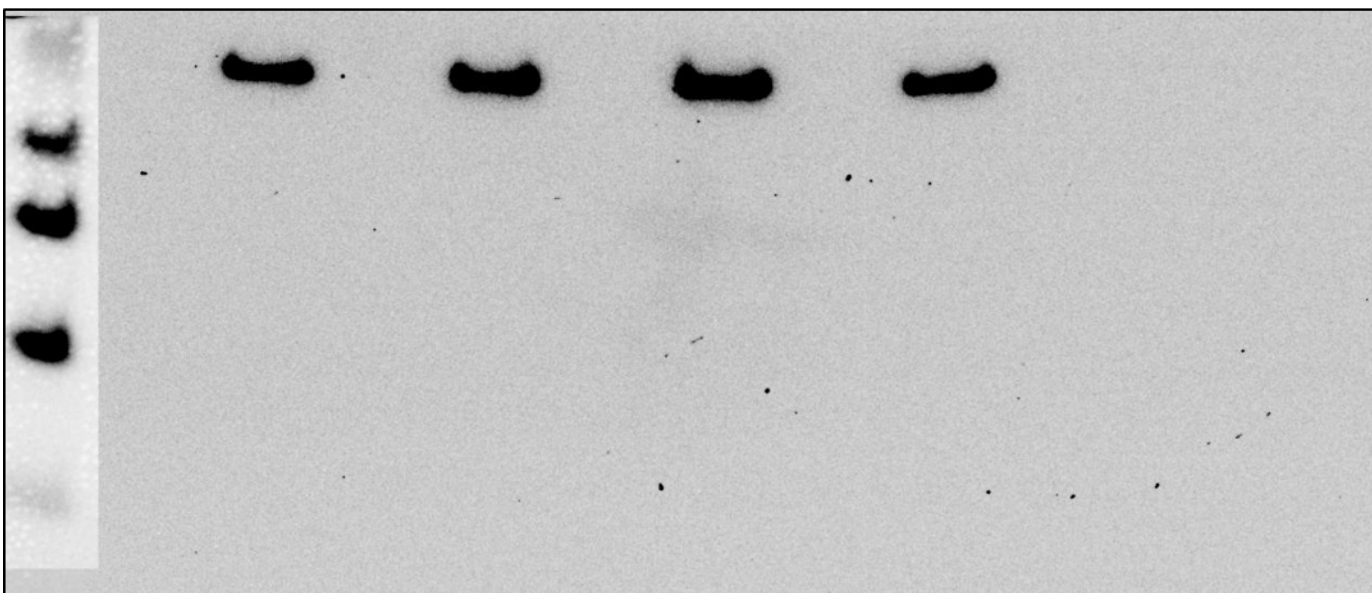

Supplement: s1 [file s1]
